# Supplementary material
Source: publisher figshare collection journal article supplement (https://acs.figshare.com/ndownloader/files/4087342)
Supplement: Supplementary file 1 [file 4087342]

# Supporting Information

## Compartmentalized Hollow Silica Nanospheres Templated from Nanoemulsions

Si-Han Wu,<sup>†</sup> Yann Hung,<sup>†</sup> and Chung-Yuan Mou<sup>†, \*</sup>

<sup>†</sup>Department of Chemistry, National Taiwan University, Taipei, Taiwan 10617

<sup>\*</sup>Center for Condensed Matter Sciences, National Taiwan University, Taipei, Taiwan 10617

E-mail: [cymou@ntu.edu.tw](mailto:cymou@ntu.edu.tw)

### *Calculation of the HLB number from a mixture of surfactants*

The HLB number of a mixture, consisting of surfactant A with HLB<sub>A</sub> and surfactant B with HLB<sub>B</sub>, is obtained by the following formula.

$$HLB_{\text{mix}} = (HLB_A \times f_A) + (HLB_B \times f_B)$$

$f_A$  is the weight fraction of surfactant A in the mixture

$f_B$  is the weight fraction of surfactant B in the mixture

| Sample         | HLB <sub>A</sub> /Surfactant | $f_A$ | HLB <sub>B</sub> /Surfactant | $f_B$ | HLB <sub>mix</sub> |
|----------------|------------------------------|-------|------------------------------|-------|--------------------|
| MC-HSN         | 10.0/ CTAB                   | 0.131 | 6.00/ Hexanol                | 0.869 | 6.52               |
| SNP-CO520      | 10.0/ CTAB                   | 0.107 | 10.0/ CO-520                 | 0.893 | 10.0               |
| SNP-TritonX100 | 10.0/ CTAB                   | 0.102 | 13.5/ Triton X-100           | 0.898 | 13.1               |
| SNP-Brij98     | 10.0/ CTAB                   | 0.101 | 15.3/ Brij98                 | 0.899 | 14.8               |

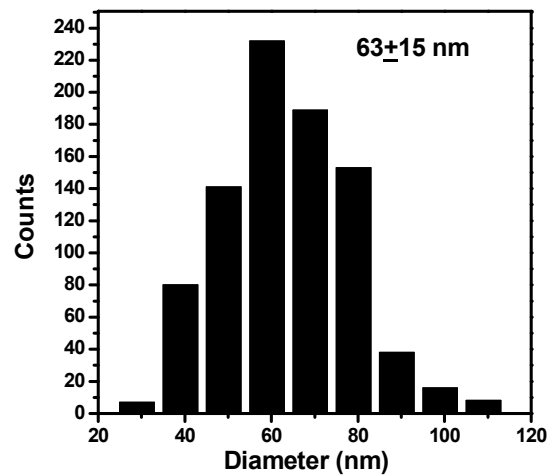

**Figure S1.** Size distribution histogram determined by TEM micrograph of SC-HSN.

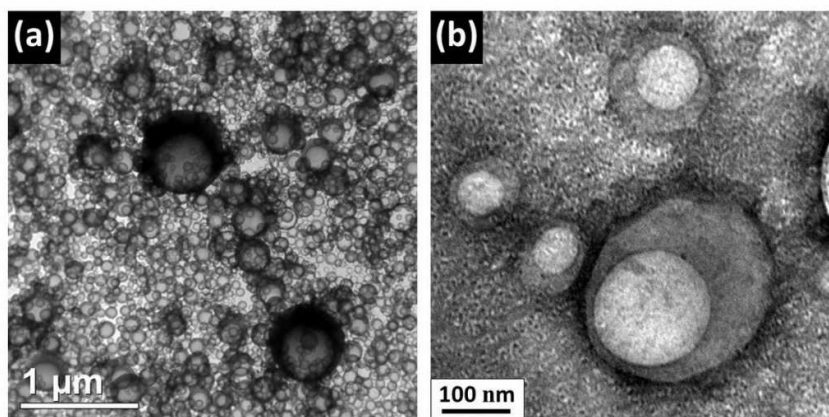

**Figure S2.** TEM images of (a) large SC-HSN at a lower stirring rate; (b) QD/Py@SC-HSN.

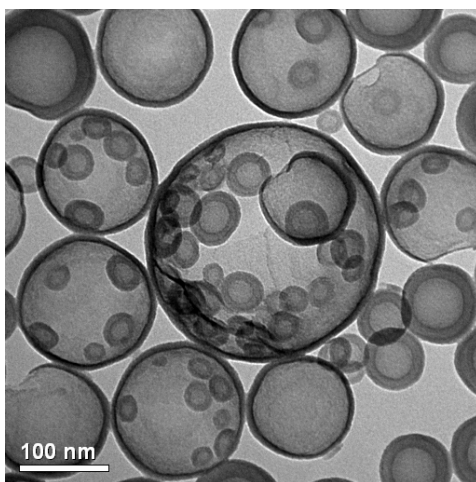

**Figure S3.** TEM images of MC-HSN after the aging and washing processes.

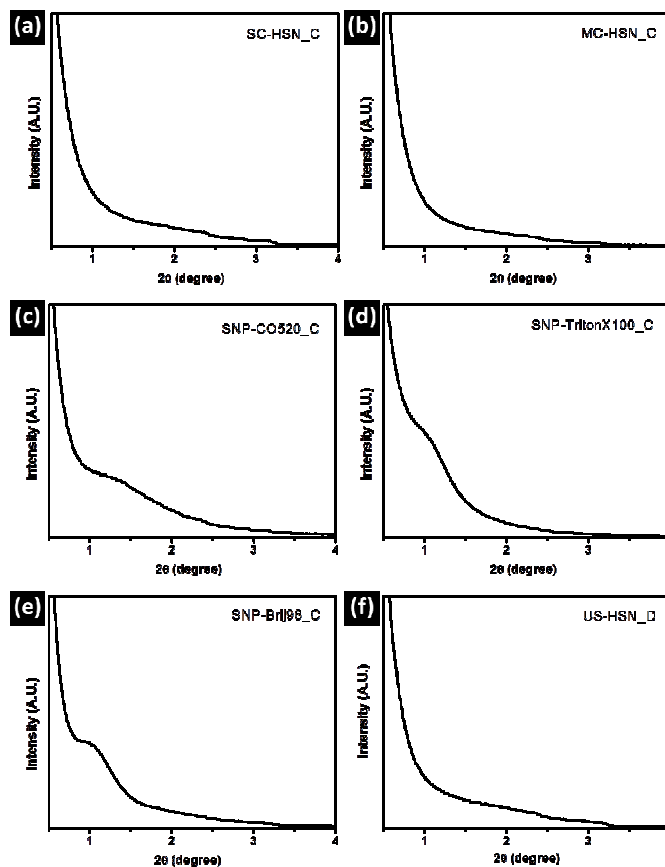

**Figure S4.** Small-angle XRD patterns of (a) SC-HSN\_C; (b) MC-HSN\_C; (c) SNP-CO520\_C; (d) SNP-TritonX100\_C; (e) SNP-Brij98\_C; (f) US-HSN\_D.

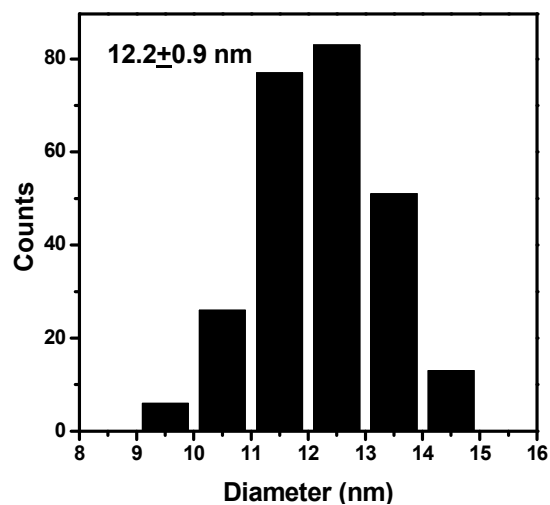

**Figure S5.** Size distribution histogram determined by TEM micrograph of US-HSN.

To investigate the effects of molecular weight of the stabilizer on the structure of the emulsion, we performed additional experiment. Another nonionic surfactant polyethylene-block-poly(ethylene glycol) (PE-b-PEG), with the same HLB value as that of CO-520 (HLB=10) but having higher molecular weight ( $M_n \sim 920$ ) than that of CO-520 ( $M_n \sim 441$ ), were used to replace CO-520 in the synthesis. As shown in the following TEM images (Figure S6), the obtained silica nanoparticles (designated as SNP-PE-b-PEG) are smaller but with similar bi-continuous structure as those formed with CO-520.

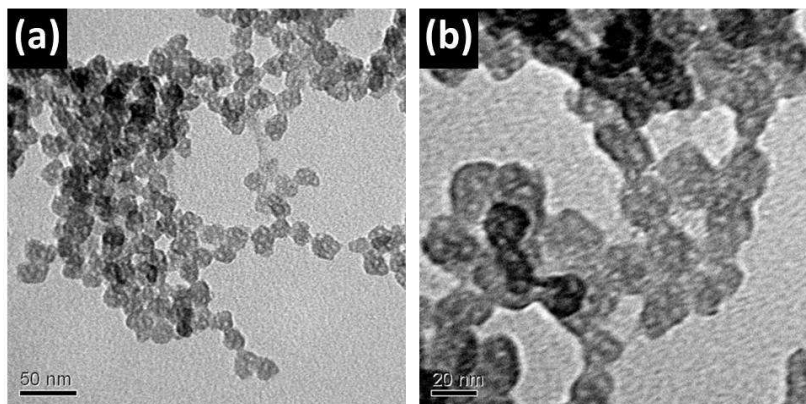

**Figure S6** TEM images of SNP-PE-b-PEG.

Viability analysis of nanopartilces on HeLa cells was evaluated according to the following process. The results show that the RhB/Coconut oil@SC-HSNs, synthesized using coconut oil as oil phase, have essentially no cytotoxic effect on HeLa cells.

Cell viability assay:

$2 \times 10^4$  HeLa cells per well were seeded in 96-well plates and incubated in a DMEM medium supplemented with 10% serum for 24 hr. After that, the cells were incubated with 100  $\mu\text{g/mL}$  of RhB/Coconut oil@SC-HSNs suspension for 4 h, followed by incubation with WST-1 reagent (Clontech) for another 2 hr at 37  $^{\circ}\text{C}$ . The yellow-color formazan dye generated by the live cells was proportional to the number of live cells and the absorbance at 450 nm was measured, with a reference wavelength of 650 nm, using a microplate reader (Bio-Rad, model 680).

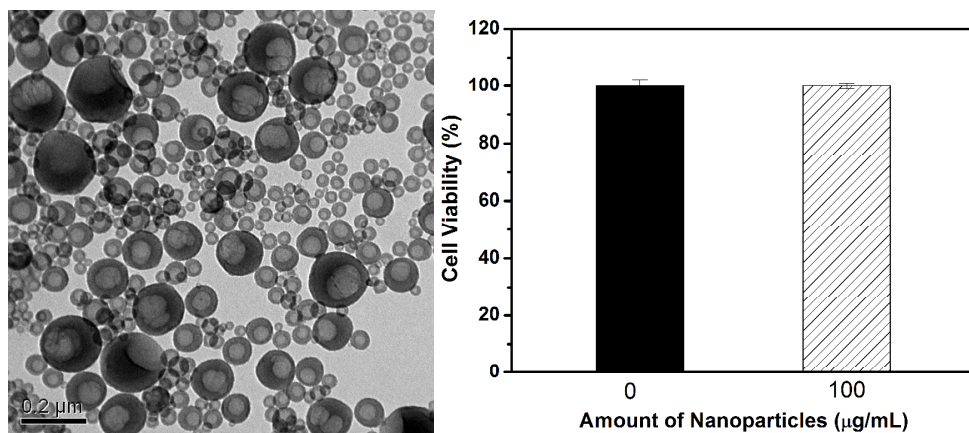

**Figure S7** Left figure: TEM image of RhB/Coconut oil@SC-HSNs. Right figure: cytotoxicity assay of HeLa cells treated with 100  $\mu\text{g/mL}$  of RhB/Coconut oil@SC-HSNs.
